# Supplementary material
Source: PubMed Central journal article supplement (PMC3033888)
Supplement: NIHMS264944-supplement-1_si_001.pdf [file NIHMS264944-supplement-1_si_001.pdf]

## Supporting Information File

### Modeling the Effect of Oxygen on the Amperometric Response of Immobilized Organoselenium-Based S-Nitrosothiol Sensors

Lajos Höfler and Mark E. Meyerhoff

*Department of Chemistry, The University of Michigan, 930 N. University, Ann Arbor, MI 48109-1055*

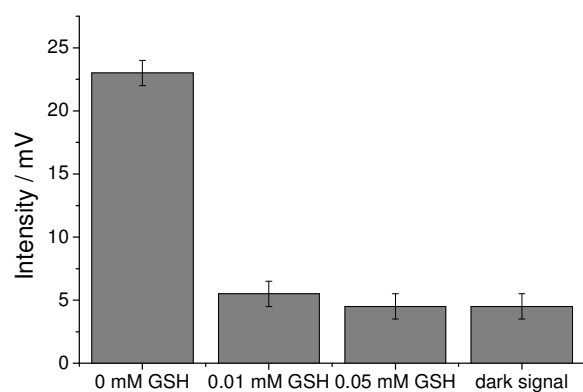

**Figure S1.** GSH concentration dependence of lucigenin-derived chemiluminescence of RSeDM in glycine-NaOH buffer (pH 10.0) solution containing 0.25 mM lucigenin.

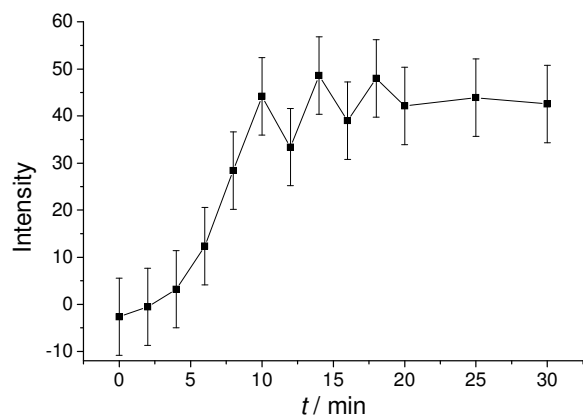

**Figure S2.** Time dependence of coelenterazine-derived chemiluminescence of RSeDM in phosphate buffer (pH 7.4) containing 100  $\mu\text{M}$  EDTA, 4 mL/L Triton X-100 surfactant and 50  $\mu\text{M}$  coelenterazine.
